## **Neural interactions in developing rhythmogenic spinal networks: Insights from computational modeling**

Natalia A. Shevtsova, Ngoc T. Ha, Ilya A. Rybak\*, Kimberly J. Dougherty\*

Department of Neurobiology and Anatomy, Drexel University, Philadelphia, PA, USA

\*equally contributing senior and corresponding authors:

[rybak@drexel.edu](mailto:rybak@drexel.edu); [kjd86@drexel.edu](mailto:kjd86@drexel.edu)

### **Abstract**

The mechanisms involved in generation of rhythmic locomotor activity in the mammalian spinal cord remain poorly understood. These mechanisms supposedly rely on both intrinsic properties of constituting neurons and interactions between them. A subset of Shox2 neurons was found to contribute to generation of spinal locomotor activity. The preceding study (Ha and Dougherty, 2018) revealed the presence of bidirectional electrical coupling between these neurons in neonatal spinal cords, which can be critically involved in neuronal synchronization and generation of populational bursting. Gap junctional connections found between functionally-related Shox2 interneurons decrease with age, possibly being replaced by increasing interactions through chemical synapses. Here, we developed a computational model of a population of these neurons sparsely connected by electrical or/and chemical synapses and investigated the dependence of frequency of populational bursting on the type and strength of neuronal interconnections. The model provides important insights into the mechanisms of the locomotor rhythm generation.

## Introduction

The mammalian spinal cord contains neuronal circuits that can generate locomotor-like oscillations in the absence of supraspinal and afferent inputs. These circuits include rhythm-generating kernels capable of producing and maintaining and coordinating populational rhythmic activity. A rhythmogenic kernel on each side of the cord is thought to be comprised of mutually connected excitatory neurons with ipsilateral projections (Kjaerulff and Kiehn, 1996; Keihn 2006; Hägglund et al., 2010). Although no single genetically identified neuron type has been found to be solely responsible for rhythm generation in the spinal cord, the genetically identified Shox2 interneurons have been suggested to be involved in locomotor rhythmogenesis (Brownstone and Wilson, 2008; Dougherty et al. 2013). Later investigations provided evidence that a subpopulation of Shox2 neurons, specifically the Shox2 nonV2a neuron type, may belong to the rhythm-generating kernel in the neonatal rodent spinal cord and be involved in generation of locomotor rhythmic activity (Dougherty et al., 2013; Kiehn, 2016).

Although the existing data on the possible cellular basis for rhythmic bursting in the Shox2 neurons remains limited, there is evidence for the expression of several types of potentially rhythmogenic currents in these neurons, including the persistent inward current (Ha et al., 2019). Based on indirect data from multiple groups (Zhong et al., 2007; Tazerart et al., 2007, 2008; Ziskind-Conhaim et al., 2008; Brocard et al., 2010, 2013; Tong et al. 2012) and previous computational models (Rybak et al., 2006a,b; McCrea and Rybak, 2007; Sherwood et al., 2011; Zhong et al., 2012; Brocard et al., 2013; Rybak et al., 2013, 2015; Shevtsova et al., 2014, Danner et al., 2016, 2017; 2019; Shevtsova and Rybak, 2016; Ausborn et al., 2019), we have suggested that the generation of locomotor rhythmic activity the spinal cord relies on the persistent sodium current ( $I_{NaP}$ ).

Regardless of the intrinsic bursting properties of single neurons involved in rhythmogenesis, mutual excitatory interactions between the neurons are critical to allow synchronization of neuronal activity leading to the generation of populational rhythmic activity. The preceding study has shown that functionally related Shox2 interneurons in neonatal mice are locally connected with each other bidirectionally via electrical synapses or gap junctions (Ha and Dougherty, 2018). This bidirectional electrical coupling may represent a mechanism for neuronal synchronization and for populational oscillations in the neonatal spinal cord. Bidirectional gap junctional coupling within each population of genetically identified neurons i.e. Shox2 nonV2a

neurons, is found with high incidence in the neonatal spinal cord. With age, this electrical coupling decreases in both incidence and strength which occurs in parallel (and possibly in connection) with an increase of the unilateral connections via chemical synapses (Ha and Dougherty, 2018). This change in the type, probability and strength of neuronal interactions may lead to specific changes in some characteristics of locomotor rhythm and pattern generated and the range of generated frequencies.

To theoretically investigate the potential roles of different (electrical and chemical) connections between Shox2 interneurons and their interaction with the  $I_{NaP}$  in generation of rhythmic populational activity, we developed a model of a population of neurons incorporating  $I_{NaP}$ , in a subset of cells that are sparsely connected by electrical and/or excitatory chemical synapses and investigated the dependence of frequency of populational bursting on the connection type and strength, the maximal conductance and distribution of  $I_{NaP}$ , and other neuronal characteristics. We demonstrated that the frequency of populational bursting activity depends on the relative expression of particular types of connections between neurons. The model proposes a mechanistic explanation for emergence of a synchronized rhythmic activity in a population of Shox2 neurons and provides insights into the mechanisms of the locomotor rhythm generation.

## Results

The major focus of the present study was on the specific roles of, and possible cooperation between, neural interactions (through gap junction coupling and/or excitatory chemical synapses) and persistent (slowly inactivating) sodium current ( $I_{\text{NaP}}$ ) in neuronal synchronization and generation of populational rhythmic activity related to the locomotor-like oscillations in the mammalian spinal cord. We started by simulating a pair of neurons operating in different regimes and connected by bidirectional gap junctions or unidirectional excitatory chemical synapses in order to investigate the effect of the type and strength of connections and the presence/absence of  $I_{\text{NaP}}$  conductance on the activity of both neurons. Then, we considered a heterogeneous population of 100 neurons which incorporated a subpopulation of neurons containing  $I_{\text{NaP}}$  and hence could intrinsically generate rhythmic bursting depending on neuronal excitability. The remaining neurons were simple spiking neurons. The neurons had parameters randomly distributed over the population and were sparsely connected by electrical and excitatory chemical synapses (Dougherty et al., 2013; Ha and Dougherty, 2018). Our modeling study focused on neuronal interactions, synchronization of neuronal activity, and control of frequency of populational bursting depending on the relative expression of different types of neuron connectivity and connection strength.

### Gap junctional coupling in two-cell model

We first simulated a pair of interneurons (In1 and In2) modelled in the Hodgkin-Huxley style and coupled bidirectionally by gap junction with conductance  $g_{\text{Gap}}$ . Each neuron represented either a conditionally bursting neuron with  $I_{\text{NaP}}$  or a simple tonically spiking neuron without  $I_{\text{NaP}}$ . The equations describing neuron dynamics and neuron parameters are specified in **Materials and Methods**.

The operating regime of each neuron (if uncoupled) was dependent on its resting membrane potential, which in turn was defined by the value of the leakage reversal potential,  $E_L$  (see Table 1). With an increase in  $E_L$ , the isolated conditionally bursting neuron changed its operating regime from silence to bursting and then to tonic spiking. The isolated “simple” neuron without  $I_{\text{NaP}}$  could switch from silence to tonic spiking when  $E_L$  increased. The strength of gap junctional coupling between the neurons ( $g_{\text{Gap}}$ ) was varied. The time course of the neuron membrane potentials for various operating regimes and the strength of coupling is illustrated in Fig. 1. The frequencies of bursting, as well as neuron resting potentials at various values of  $g_{\text{Gap}}$  are shown in Table 1.

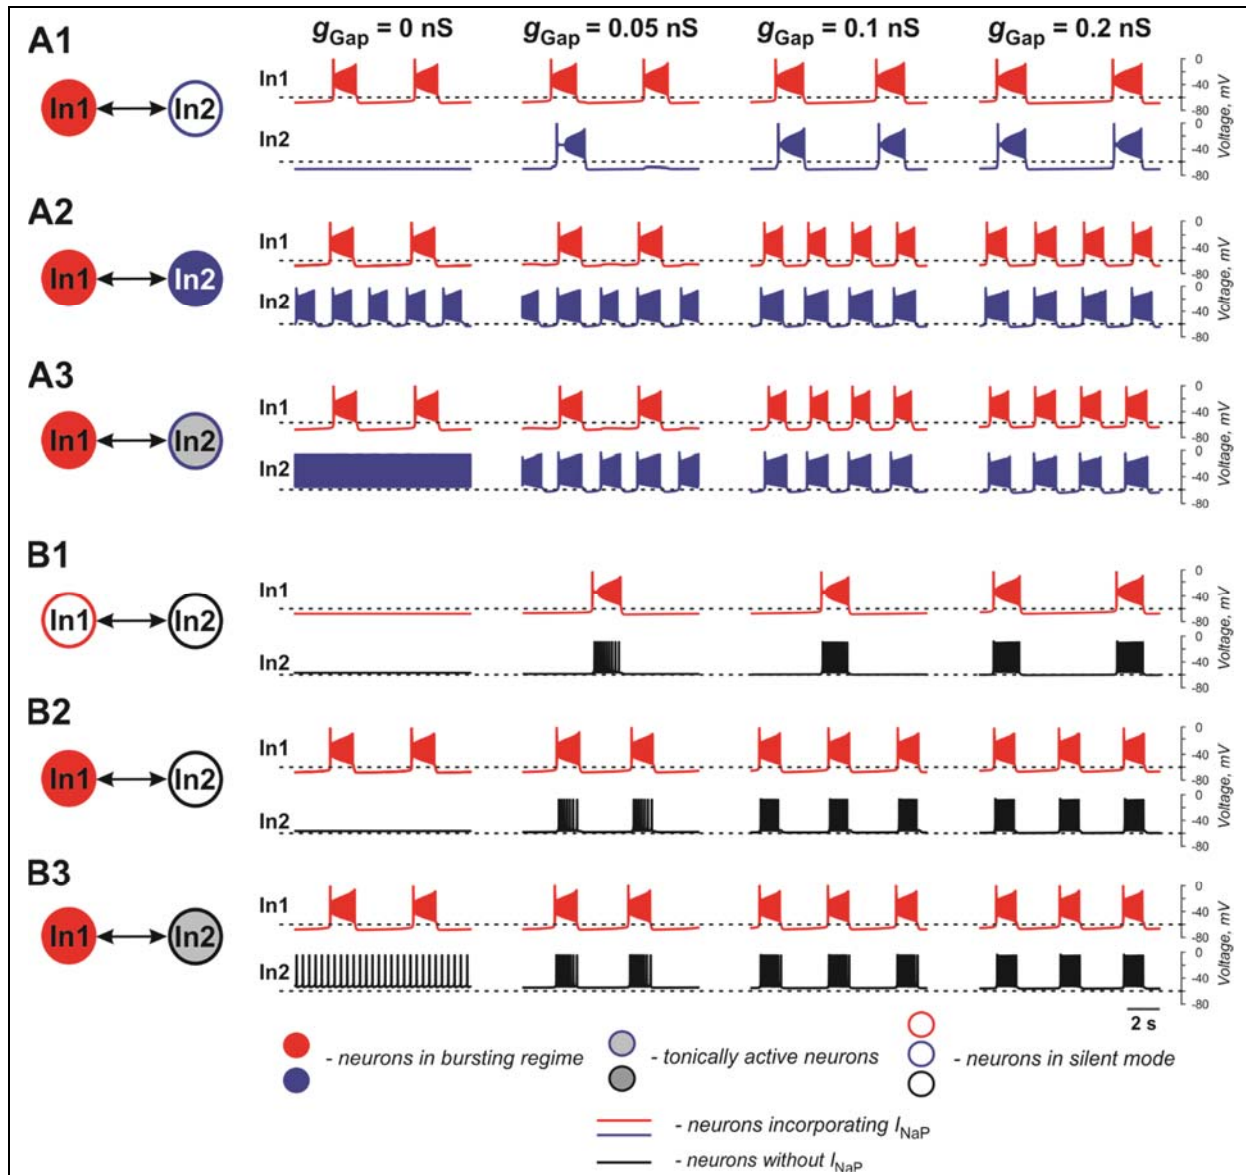

**Figure 1.** Effects of electrical coupling on activity of two neurons (In1 and In2). **A1-A3:** Both neurons incorporate the persistent sodium current ( $I_{NaP}$ ). In1 is in a bursting mode and In2 is silent if uncoupled (A1), operates in a bursting regime (A2), or is tonically active (A3). **B1-B3:** Only In1 incorporates  $I_{NaP}$  and, if uncoupled, is silent (B1) or operates in a bursting regime (B2 and B3). In2, if uncoupled, is either silent (B1 and B2) or tonically active (B3). The strength of electrical coupling increases from left to right.

In our simulations shown in Fig. 1A1-A3, both neurons (In1 and In2) incorporate  $I_{NaP}$ . In all three panels, In1 operates in a bursting mode, whereas In2 is silent (at low level of excitation, panel A1), exhibits bursting (at intermediate level of excitation, panel A2), or is tonic spiking (at a highest level of excitation, panel A3). The effect of gap junctional coupling depends on the difference between the membrane potentials of coupled neurons and the strength of coupling, and hence can be depolarizing for one neuron and hyperpolarizing for the other one. In all three cases,

gap junctional coupling leads to synchronization of neuronal bursting from the burst ratio M:1,  $M > 1$  at a lower  $g_{\text{Gap}}$  ( $0.375 < g_{\text{Gap}} < 0.66$  nS) to the ratio of 1:1 at higher  $g_{\text{Gap}}$  ( $g_{\text{Gap}} \geq 0.66$  nS) values. Note that coupling may reduce bursting frequency relative to the uncoupled case (see panel A1) or increased it (panels A2 and A3, see also Table 1) depending on the relative values of the resting membrane potentials of coupled neurons. This is seen in Fig. 1A1 when In1 depolarizes In2 and induces bursting in this neuron with common burst frequency at higher  $g_{\text{Gap}}$ . At the same time, In2 hyperpolarizes In1 resulting in a general decrease of common bursting frequency relative to the uncoupled case with increased  $g_{\text{Gap}}$  (see Table 1). In Fig. 1A2, A3 we see the opposite situation. In these cases, both neurons operate in bursting regimes. However, the level of excitation of In1 is lower than that of In2, and prior to coupling, In2 generates bursts with a higher frequency than In1 in Fig. 1A2 and is even tonically active in Fig. 1A3. Electrical coupling of these neurons leads to depolarization of In1 and hyperpolarization of In2. As a result, burst frequency of In1 increases while burst frequency of In2 decreases. In Fig. 1A3, at lower  $g_{\text{Gap}}$  In2 switches from tonic to bursting mode when coupled with the burst ratio 1:2. Similar to the simulation shown in Fig. 1A1, at higher  $g_{\text{Gap}}$  the two-cell model shows a synchronized bursting activity; however, the resulting frequency is higher than the initial In1 frequency (see Table 1). Hence gap junctional coupling between neurons with  $I_{\text{NaP}}$  leads to synchronized rhythmic bursting with burst frequency dependent on neuronal excitability and the strength of coupling.

Table 1. Effect of electrical coupling on neuron activity in two-cell model

| Neuron | $I_{\text{NaP}}$ | $E_L$ | Regime | Resting potential, mV                        |       |       |       | Frequency, Hz                                |             |             |             |
|--------|------------------|-------|--------|----------------------------------------------|-------|-------|-------|----------------------------------------------|-------------|-------------|-------------|
|        |                  |       |        | Connection strength ( $g_{\text{Gap}}$ , nS) |       |       |       | Connection strength ( $g_{\text{Gap}}$ , nS) |             |             |             |
|        |                  |       |        | 0                                            | 0.05  | 0.1   | 0.2   | 0                                            | 0.05        | 0.1         | 0.2         |
| In1    | +                | -76.5 | B      | -66                                          | -66   | -66.1 | -66.4 | 0.2                                          | 0.2         | <b>0.16</b> | <b>0.14</b> |
| In2    | +                | -80   | S      | -71                                          | -70.5 | -70.2 | -70   | N/A                                          | 0.08        |             |             |
| In1    | +                | -76.5 | B      | -66                                          | -66.4 | -66.4 | -66.4 | 0.2                                          | 0.2         | <b>0.35</b> | <b>0.33</b> |
| In2    | +                | -72.5 | B      | -62.7                                        | -62.8 | -62.9 | -62.9 | 0.43                                         | 0.36        |             |             |
| In1    | +                | -76.5 | B      | -66                                          | -65.8 | -67   | -66.5 | 0.2                                          | 0.2         | <b>0.39</b> | <b>0.36</b> |
| In2    | +                | -72   | T      | -55.4                                        | -61.8 | -61.9 | -62.7 | N/A                                          | 0.44        |             |             |
| In1    | +                | -80   | S      | -69.1                                        | -67.5 | -66.8 | -66   | N/A                                          | <b>0.07</b> | <b>0.1</b>  | <b>0.13</b> |
| In2    | -                | -66   | S      | -57                                          | -58.5 | -59.1 | -59.9 | N/A                                          |             |             |             |
| In1    | +                | -76.5 | B      | -66                                          | -65.8 | -65.6 | -65.2 | 0.2                                          | <b>0.22</b> | <b>0.23</b> | <b>0.25</b> |
| In2    | -                | -66   | S      | -57                                          | -58.3 | -58.7 | -59.8 | N/A                                          |             |             |             |
| In1    | +                | -76.5 | B      | -66                                          | -65.8 | -65.6 | -65   | 0.2                                          | <b>0.22</b> | <b>0.24</b> | <b>0.26</b> |
| In2    | -                | -65.7 | T      | -56.1                                        | -57.7 | -58.5 | -58.3 | N/A                                          |             |             |             |

Notation: “+” – neuron incorporating the persistent sodium current ( $I_{\text{NaP}}$ ); “-” – neuron non-incorporating  $I_{\text{NaP}}$ ; “B” – neuron generating bursting activity; “S” – neuron in a silent mode; “T” – neuron generating tonic activity; frequency of synchronized activity of two neurons is shown by bold.

In simulations shown in Fig. 1B1-B3, only one of the two electrically coupled neurons (In1) has  $I_{NaP}$ . Prior the coupling, this neuron can be silent (panel B1) or operate in a bursting regime (panels B2 and B3), whereas the other, “simple” neuron (In2), depending on the level of its excitation can be silent (panels B1 and B2) and exhibits tonic spiking (panel B3). In all these simulations, the In2 neuron has higher resting potential if uncoupled and depolarizes In1 if the two neurons are connected by gap junctions (see Table 1). This results in the emergence of bursting activity (as in panel B1) or in an increase of the bursting frequency with increasing  $g_{Gap}$  (panels B2 and B3). In all three cases, In1 hyperpolarizes In2 during interburst intervals but induces high-frequency spiking in In2 during bursts, resulting in synchronized activity of the two-cell model replicating bursting activity of In1.

The two neurons in Fig. 2 are similar to those shown in Figure 1B1 and only one of the two electrically coupled neurons (In1) has  $I_{NaP}$ . Here, instead of varying the strength of gap junctional coupling, it was set at 0.1 nS and the effects of varying the strength of  $I_{NaP}$  are illustrated. At  $\bar{g}_{NaP}$  below the level shown in Fig 2, both neurons remain silent. However, with increasing  $\bar{g}_{NaP}$ , bursting emerges and increases in frequency. The results demonstrate that the presence of  $I_{NaP}$  in one neuron can initiate synchronized bursting in electrically coupled neurons even if both neurons when uncoupled are silent.

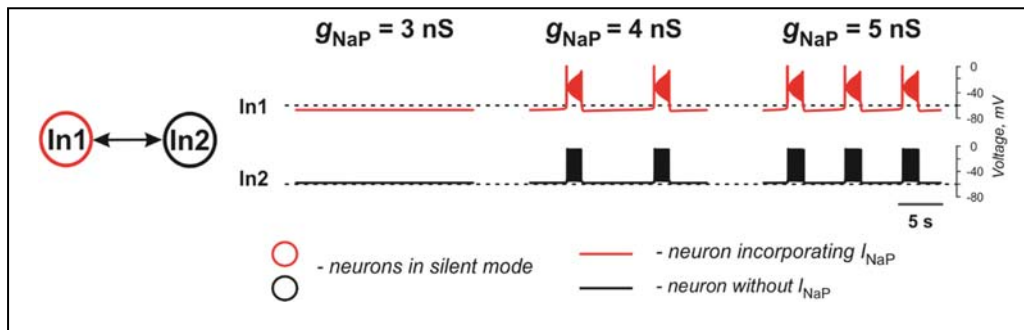

**Figure 2.** Effects of increasing  $I_{NaP}$  conductance ( $g_{NaP}$ ) on activity of two neurons mutually connected via gap junction. The strength of the electrical connection ( $g_{Gap}$ ) is 0.1 nS.

Overall, gap junctional coupling leads to equilibration of membrane potentials between the coupled neurons, regardless of the presence/absence of  $I_{NaP}$ . Depending on the direction of change (depolarization or hyperpolarization), this coupling will either increase or decrease bursting frequency of coupled neurons with  $I_{NaP}$  and bring neurons without  $I_{NaP}$  from silent or tonic to bursting mode in synchrony with neurons with  $I_{NaP}$ . In turn,  $I_{NaP}$  in some neurons can amplify the



effect of electrical coupling of these neurons with other neurons. Finally, both the presence of  $I_{NaP}$  in some neurons and electrical coupling between neurons promotes neuronal synchronization and both are critical for initiation and support of populational bursting.

### **Excitatory chemical synaptic connections in two-cell model**

In the case of excitatory connections by chemical synapses, we considered only unidirectional connections because all reported chemical synapses between Shox2 neurons have been unidirectional (Dougherty et al. 2013, Ha and Dougherty, 2018). Figure 3 and Table 2 illustrate effects of excitatory chemical synaptic connections in the two-cell model when both neurons (source neuron In1 and target neuron In2) are bursting neurons incorporating  $I_{NaP}$  (panels A1-A3), or when  $I_{NaP}$  is incorporated in only In1 (panels B1 and B2) or only In2 neuron (panels C1 and C2).

In Fig. 3A1-A3, the target neuron (In2) that incorporates  $I_{NaP}$  operates in various regimes without connection: silent (panel A1), bursting (A2), and tonic spiking (A3). The synaptic input from In1 to In2 leads to bursting activity in In2 with a burst ratio of 2:1 at a low  $w_{Syn}$  (0.5) or synchronized bursting of both neurons (at higher  $w_{Syn}$  values in panel A1 and in panels A2 and A3, see also Table 2).

In Fig. 3B1, B2, the target neuron In2 does not have  $I_{NaP}$  and when uncoupled is either silent (panel B1) or generates tonic spiking (panel B2). In these cases, when In2 receives rhythmic excitatory synaptic input from the source neuron In1, it follows In1 activity and generates bursts synchronously with the source. In Fig. 2B2, the bursting activity in In2 occurs on the background of baseline spiking activity.

In Fig. 3C1, C2, the source neuron In1 is a “simple” neuron without  $I_{NaP}$  that generates a sustained spiking activity providing constant excitatory synaptic drive to the target In2 neuron with  $I_{NaP}$ . This drive depolarizes In2 and this depolarization increases with the strength of synaptic input ( $w_{Syn}$ ). Therefore, depending on the baseline regime of the target In2 neuron, this input results either in the emergence of bursting activity (panel C1) or the increasing of bursting frequency (panel C2, see also Table 2) in the target In2 neuron.

The above simulations have shown that chemical connections in the two-cell model promote neuronal synchronization and have variable effects on the resultant common bursting frequency.



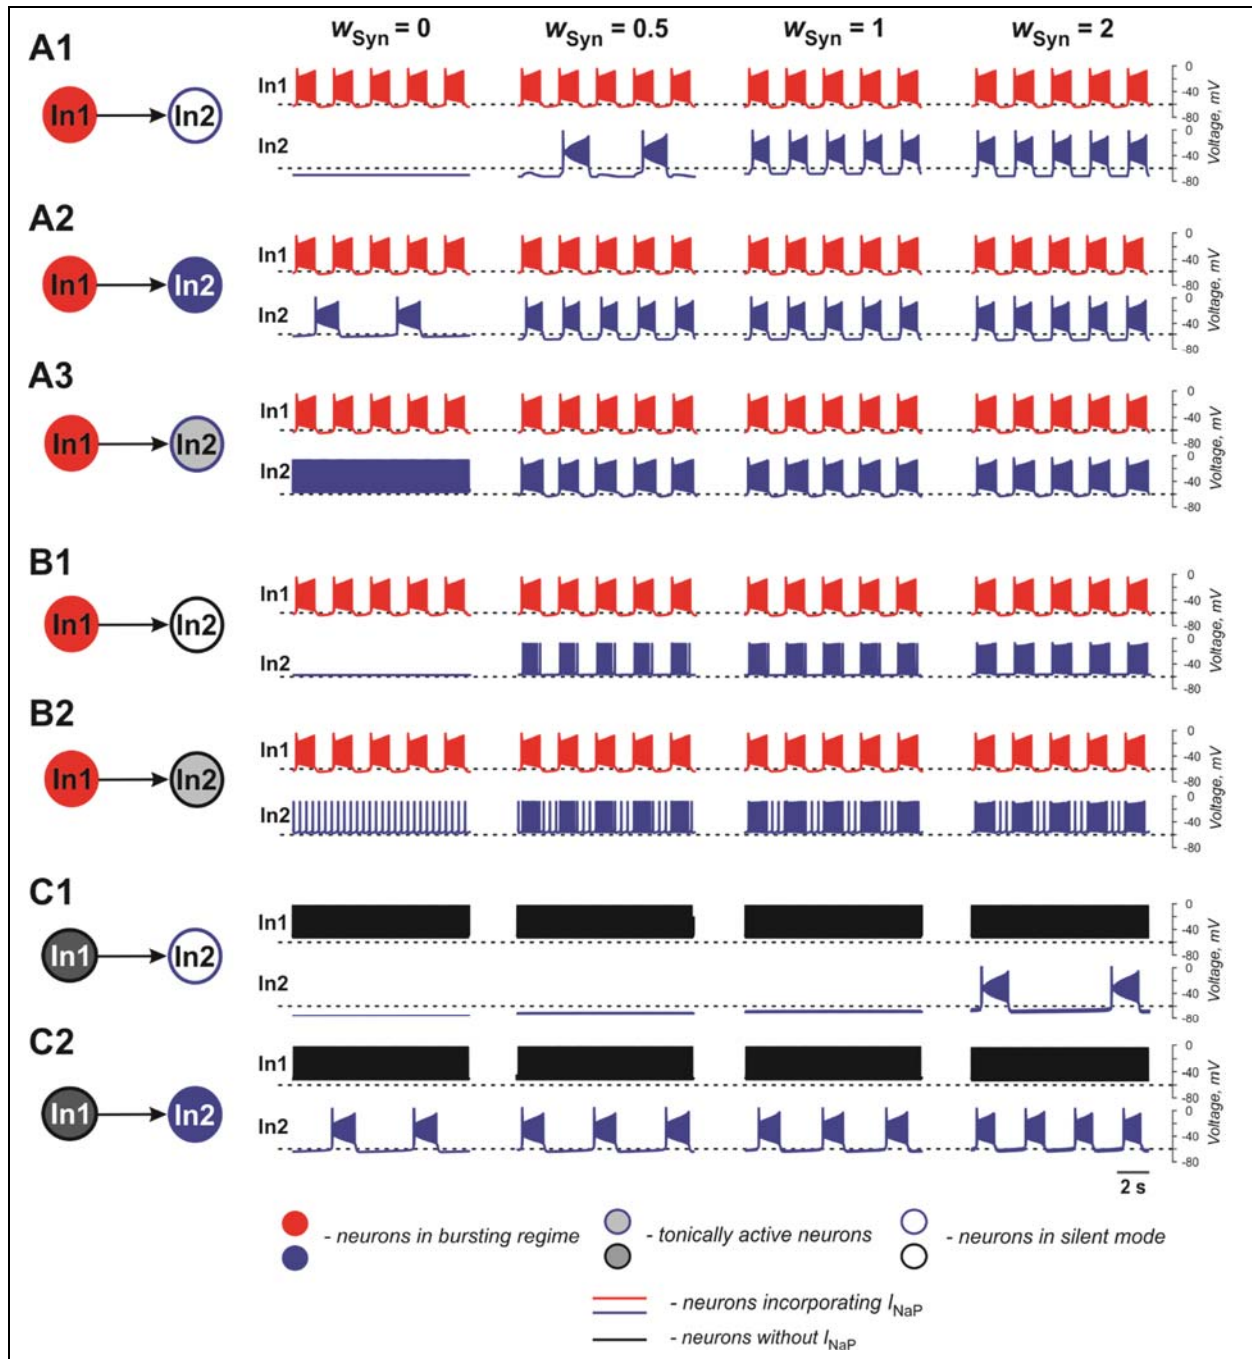

**Figure 3.** Effects of the excitatory chemical coupling on activity of two neurons (In1 and In2). **A1-A3:** Both neurons incorporate the persistent sodium current ( $I_{NaP}$ ). In1 is in a bursting mode and In2, if uncoupled, is silent (A1), or operates in a bursting regime (A2), or is tonically active (A3). **B1, B2:** Only In1 incorporates  $I_{NaP}$  and operates in a bursting regime and In2, if uncoupled, is either silent (B1) or tonically active (B2). **C1-C2:** In1 does not incorporate  $I_{NaP}$  and is tonically active. In2 incorporates  $I_{NaP}$  and if uncoupled, is either silent (B1) or operates in a bursting regime (B2). The weight of synaptic connection increases from left to right.

Table 2. Effect of chemical coupling on neuron activity in two-cell model

| Neuron | $I_{NaP}$ | $E_L$ | Regime | Resting potential, mV             |       |       |       | Frequency, Hz                     |             |             |      |
|--------|-----------|-------|--------|-----------------------------------|-------|-------|-------|-----------------------------------|-------------|-------------|------|
|        |           |       |        | Connection strength ( $w_{Syn}$ ) |       |       |       | Connection strength ( $w_{Syn}$ ) |             |             |      |
|        |           |       |        | 0                                 | 0.5   | 1     | 2     | 0                                 | 0.5         | 1           | 2    |
| In1    | +         | -72.5 | B      | 62.7                              |       |       |       | 0.43                              |             |             |      |
| In2    | +         | -80   | S      | -71                               | -71.3 | -71.9 |       | N/A                               | 0.2         | <b>0.43</b> |      |
| In2    | +         | -76.5 | B      | -66                               | -68.3 |       |       | 0.2                               | <b>0.43</b> |             |      |
| In2    | +         | -68.4 | T      | -55.4                             | -61.7 |       |       | N/A                               | <b>0.43</b> |             |      |
| In2    | -         | -66   | S      | -57                               |       |       |       | N/A                               | <b>0.43</b> |             |      |
| In2    | -         | -62.7 | T      | -56.1                             |       |       |       | N/A                               | <b>0.43</b> |             |      |
| In1    | -         | -64.5 | T      | -55.2                             |       |       |       | N/A                               |             |             |      |
| In2    | +         | -80   | S      | -71                               | -70.5 | -70   | -68.5 | N/A                               | N/A         | N/A         | 0.12 |
| In2    | +         | -76.5 | B      | -66                               | -65.6 | -65.1 | -64.5 | 0.2                               | 0.22        | 0.25        | 0.33 |

Notation is the same as in Table 1

### Populational models

To study the synchronization and frequency control in a heterogeneous population of Shox2 neurons connected by electrical and/or excitatory chemical synapses, we developed a model of a population of 100 neurons consisting of neurons with the intrinsic bursting properties (based on the incorporated  $I_{NaP}$ ) and “simple” neurons without such properties (with base ratio of 40/60%). All neurons were described in the Hodgkin-Huxley style as in the two-cell models described above. The neurons in the population were sparsely connected by electrical and/or excitatory chemical synapses with probability of  $p_{Gap} = 0.3$  and/or  $p_{Syn} = 0.1$  (Dougherty et al., 2013; Ha and Dougherty, 2018). Following Butera et al. (1999b), we chose the leakage reversal potential,  $E_L$ , the leakage conductance,  $g_{Leak}$  and the maximum conductance of the persistent sodium current,  $\bar{g}_{NaP}$ , to be randomly distributed over population to provide natural heterogeneity between single neuron states. These parameters are the ones that define the basic level of neuronal excitation and their ability to intrinsically generate bursting activity (Butera et al. 1999a, b; Del Negro et al. 2002; Koizumi and Smith, 2008).  $E_L$ ,  $\bar{g}_{NaP}$  and  $g_{Leak}$  for neurons were distributed normally with a priory assigned means and standard deviation (see **Materials and Methods**). The major focus of our studies was on the generation of populational activity and frequency control of populational bursting for different types of connections and depending on the relative expression of different types of neuron connectivity and connection strength.

### ***Performance of populational model with electrical coupling***

To investigate the role of gap junction in populational bursting, we simulated a population of 100 neurons with bidirectional electrical coupling with coupling probability of 0.3. Figure 4 shows the model performance for different values of coupling ( $g_{\text{Gap}}$ ) in the population. In each panel, the upper row shows the averaged populational activity, the middle row shows raster plots of spikes elicited by all neurons in the population, and the bottom row shows traces of membrane potentials of several sample neurons with different excitabilities. Neurons with  $I_{\text{NaP}}$  are shown by red and neurons without  $I_{\text{NaP}}$  are shown by black. In Fig. 4A, neurons in the population are uncoupled ( $g_{\text{Gap}} = 0$ ). Because of the random distribution of neuronal parameters, neurons operate in different basic regimes: some neurons with  $I_{\text{NaP}}$  are silent, some generate bursting activity with different burst

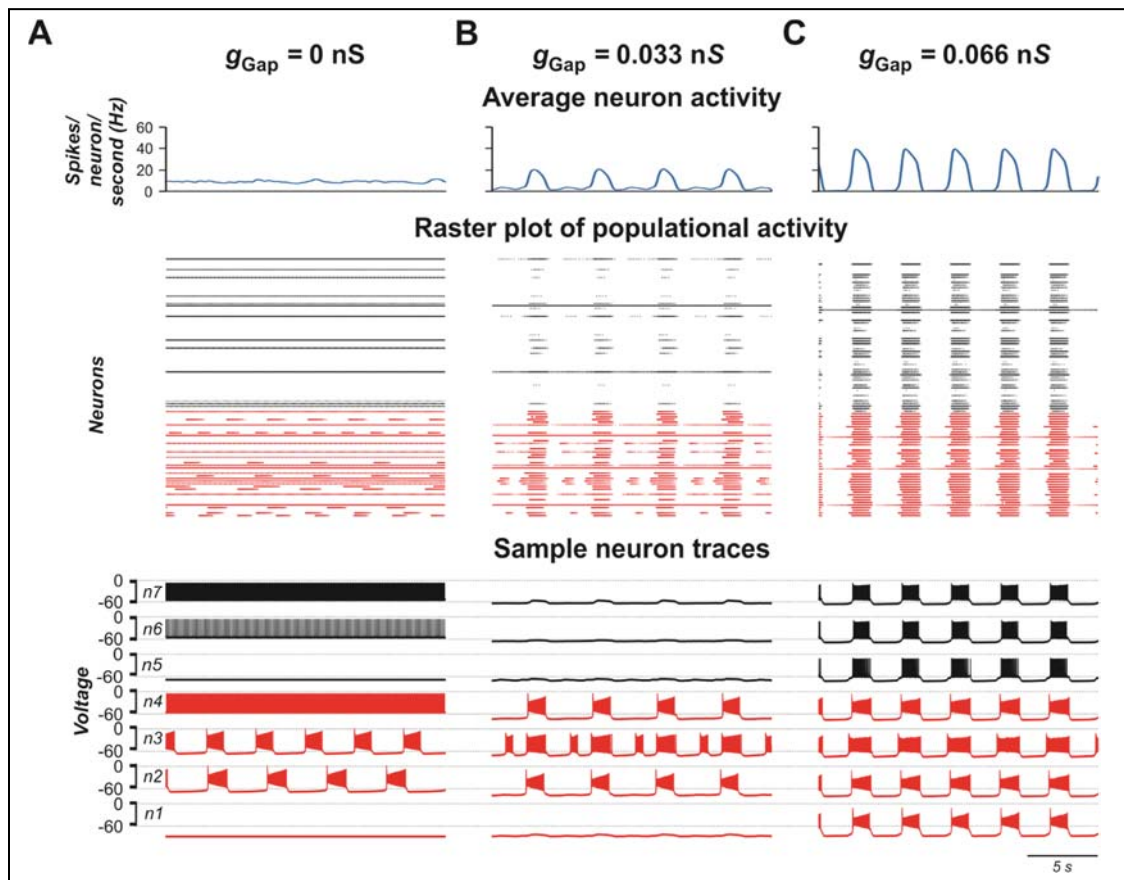

**Figure 4.** Model performance at different values of electrical connection strength in the population ( $g_{\text{Gap}}$ ).  $g_{\text{Gap}} = 0$  in **A**, 0.033 in **B**, and 0.066 in **C**. The probability of connection is 0.3. The upper row in each panel shows populational activity as an averaged histogram of neuron spiking [spikes/( $N \times s$ ), where  $N = 100$  is the number of neurons in population; bin = 100 ms]. The middle rows show raster plots of spikes elicited by neurons in the population. The lower rows show traces of the membrane potential of sample neurons. 40% of neurons in the population incorporate  $I_{\text{NaP}}$  and are shown by red and neurons without  $I_{\text{NaP}}$  are shown by black.

frequencies, and some are tonically active. Similarly, some neurons without  $I_{NaP}$  are silent and some demonstrate constant spiking activity with different frequencies. The integrated neuron activity is sustained (upper row in Fig. 4A). With increased electrical coupling ( $g_{Gap} = 0.033$  nS, Fig 4B), most of neurons incorporating  $I_{NaP}$  synchronize their bursting activity and some neurons without  $I_{NaP}$  become involved in populational bursting. Further increase of  $g_{Gap}$  ( $g_{Gap} = 0.066$  nS, Fig 4C) results in synchronization of bursting activity of all neurons incorporating  $I_{NaP}$  and involvement of the majority of neurons without  $I_{NaP}$  in populational bursting, which increases frequency and amplitude of populational bursting activity (see upper row in Fig. 4C).

Interestingly, the frequency and amplitude of populational bursting depends on expression of  $I_{NaP}$  in neurons of the population. Figure 5 shows the dependence of the frequency and amplitude of populational bursting on the average value of the  $I_{NaP}$  conductance ( $\bar{g}_{NaP}$ ) for three different values of  $N_{NaP}$ , defining the number of neurons with  $I_{NaP}$  in the population. As  $N_{NaP}$  increases, the

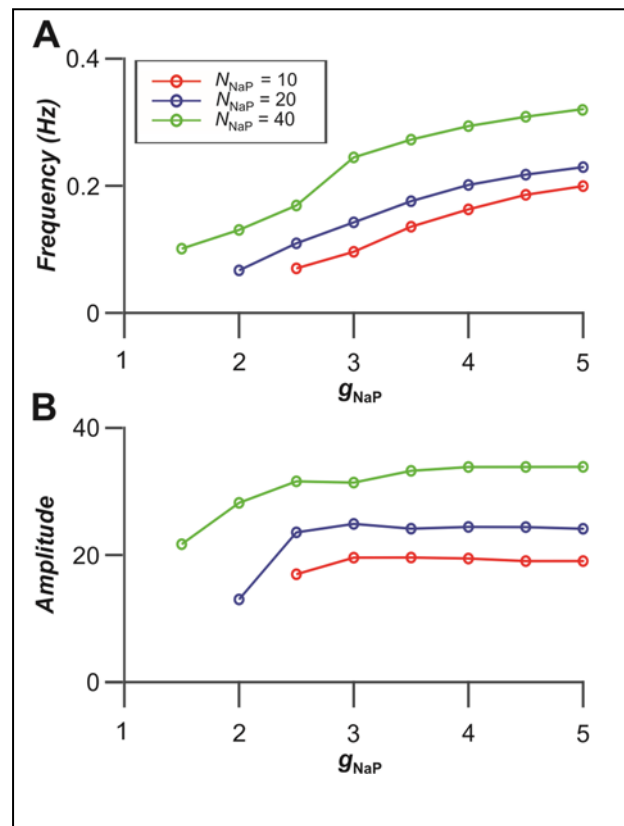

**Figure 5.** Dependence of bursting frequency (A) and amplitude (B) on the average value of the  $I_{NaP}$  conductance ( $g_{NaP}$ ) for three values of  $N_{NaP}$ , numbers of neurons incorporating  $I_{NaP}$  in the population. In these simulations,  $g_{Gap} = 0.18$  nS

populational bursting starts at lower values of  $\bar{g}_{\text{NaP}}$ . The burst frequency increases with increasing values of both  $\bar{g}_{\text{NaP}}$  and  $N_{\text{NaP}}$  (panel A), and amplitude of populational bursts is higher at greater  $N_{\text{NaP}}$  values but depends on  $\bar{g}_{\text{NaP}}$  only at lower  $\bar{g}_{\text{NaP}}$  values (panel B).

### ***Gap junctional coupling and locomotor-like activity in the spinal cord.***

Previous experimental studies have shown that blocking gap junctions with carbenoxolone reduces the frequency of oscillations of the locomotor-like activity in the isolated rodent cord evoked by the mixture of NMDA and 5-HT (Ha and Dougherty, 2018). Figure 6A1, A2 shows one example of ventral root recordings during drug-evoked locomotion prior to and 30 min after carbenoxolone application begins. Burst frequency and amplitude are quantified in Fig. 6B1, B2 demonstrating that blocking gap junctions in these preparations reduces the frequency of locomotor oscillations and, in most cases, the amplitude of integrated locomotor activity. To simulate the effect of blocking electrical synapses, we reduced the strength of gap junction coupling between neurons by 50 % in our model. Figure 6C1,C2 demonstrates the average populational activity for a sample simulation when  $g_{\text{Gap}}$  was reduced by 50%. To generally estimate the effect of this reduction on frequency and amplitude of synchronized bursting, we ran several simulations for populations with different randomization of neuron parameters. As can be seen in Fig. 6D1, D2, regardless of parameter distribution, our model exhibits changes in the frequency and amplitude of oscillations with a decrease of  $g_{\text{Gap}}$  similar to experimental results shown in Fig. 6A1, A2, B1, B2.

### ***Performance of populational model with chemical coupling***

In the next stage of this study, we considered the same population of 100 neurons, but replaced the bidirectional gap junction connections within the population with unilateral excitatory chemical connections with probability of  $p_{\text{Syn}} = 0.1$  (Dougherty et al., 2013). Figure 7 shows the model performance for different weights of excitatory synaptic connections ( $w_{\text{Syn}}$ ) in the population. As can be seen in these simulations, enhancing  $w_{\text{Syn}}$  increases the number of tonically active neurons both among neurons with and without  $I_{\text{NaP}}$  (Fig. 7A, B). Simultaneously, the bursting neurons start to consolidate in clusters including synchronously active neurons with  $I_{\text{NaP}}$  and partially involving neurons without  $I_{\text{NaP}}$  in bursting activity. Further increase of  $w_{\text{Syn}}$  increases frequency of bursting in neurons with  $I_{\text{NaP}}$  and synchronizes all neurons, resulting in populational synchronous bursting of high frequency and amplitude.



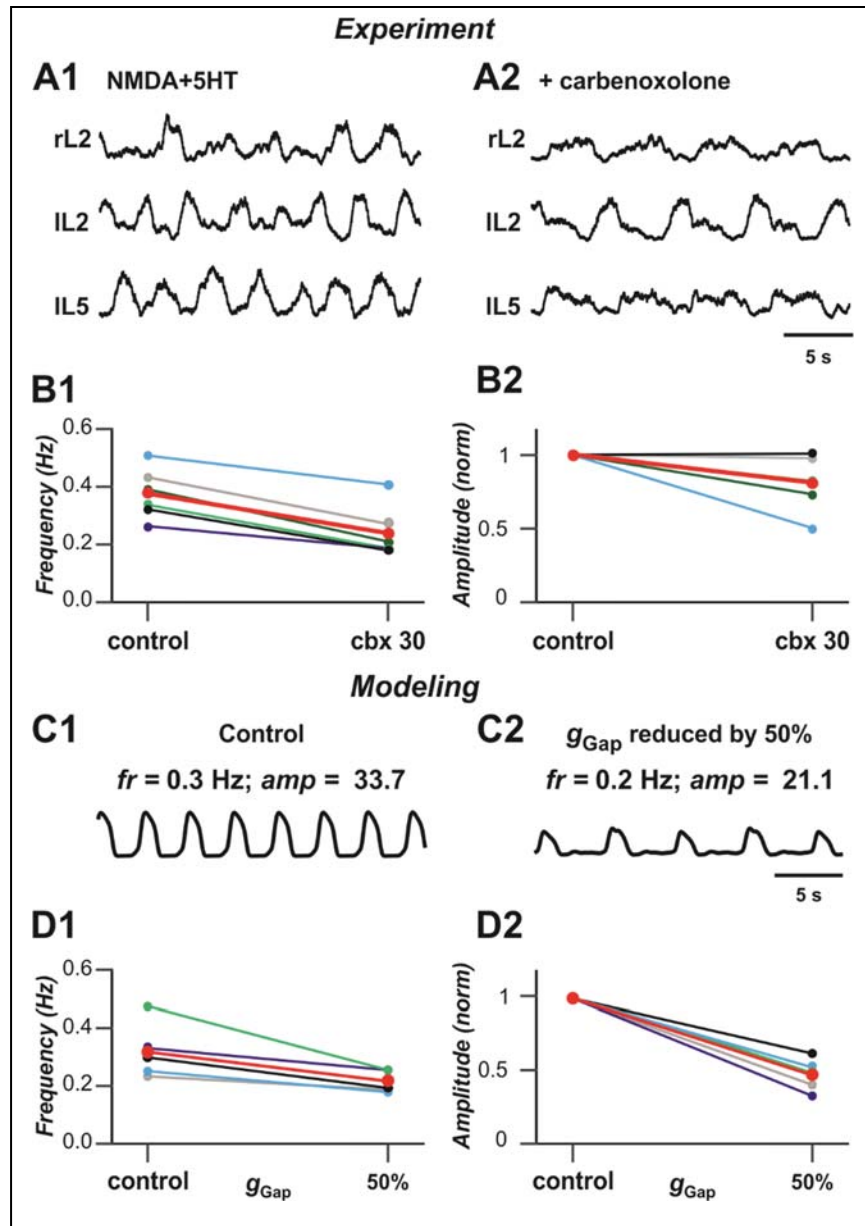

**Figure 6.** Blocking gap junctions decreases locomotor frequency. **A1, A2:** Extracellular recordings from ventral roots at lumbar level 2 (L2)-flexor dominant root- and level 5 (L5)-extensor dominant root- on the right (r) and left (l) sides of the spinal cord after application of NMDA (7 mM) and serotonin (8 mM) in control case and after addition of carbenoxolone (100  $\mu$ M). **B1, B2:** Effect of duration of carbenoxolone application on frequency (B1) and normalized amplitude (B2) of locomotor activity for 6 spinal cord preparations. Each circle represents the mean value of estimated parameter for one recording. Thinner lines connecting two circles represent parameter change in one cord. Thick red lines represent the means. The black lines in B1 and B2 correspond to the experimental recordings shown in A1 and A2. **C1, C2:** Effect of decreased strength of electrical coupling ( $g_{Gap}$ ) on populational activity. **D1, D2:** Effect of  $g_{Gap}$  reduction on frequency (D1) and normalized amplitude of locomotor activity for 5 simulations with different randomizations of model parameters (simulation time 60 s). Each circle represents the average value of estimated parameter for one simulation. Light colored lines connecting two circles represent parameter change in simulation. Thick red lines represent the means. The black lines in D1 and D2 correspond to the simulations shown in C1 and C2.

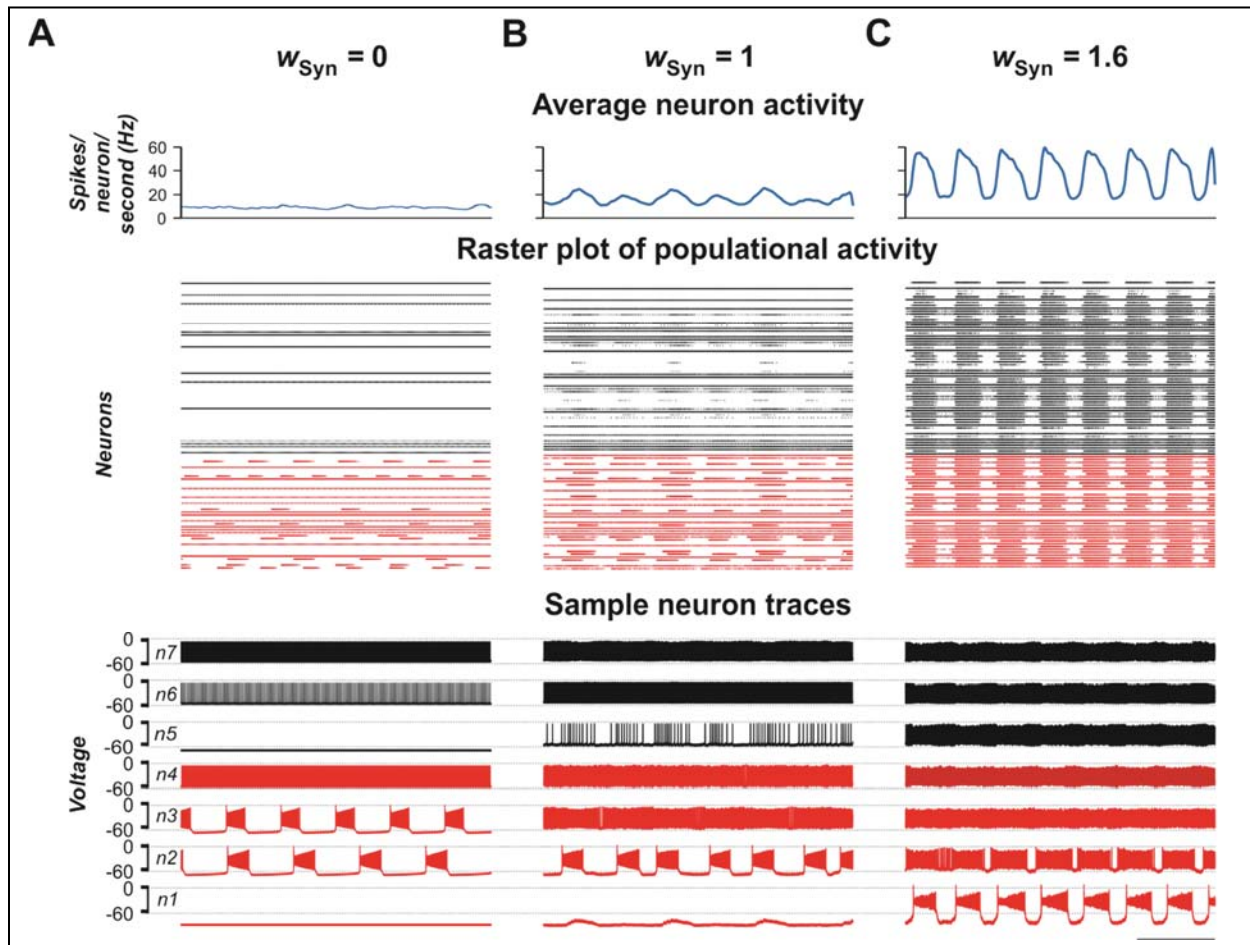

**Figure 7.** Model performance at different values of excitatory chemical connection strength in the population ( $w_{\text{Syn}}$ ). The probability of connection is 0.1. Arrangement and notation are the same as in Fig. 4.

***Contribution of neuronal coupling by electrical and chemical synapses to populational activity***

Experimental studies have shown that electrical coupling between Shox2 neurons is age-dependent. It is prevalent between functionally related Shox2 neurons in neonatal spinal cords and decreases in incidence and strength with age (Ha and Dougherty, 2018). To investigate how the activity of the population changes when both electrical and excitatory chemical connections are varied, we simulated a population in which both electrical and chemical synapses are present and sparsely distributed among neurons with probabilities of  $g_{\text{Gap}} = 0.3$  and  $p_{\text{Syn}} = 0.1$  and introduced two variables  $G$  and  $W$ , characterizing in average the total network electrical or chemical synaptic input to each neuron in the population, respectively (see **Materials and Methods**).

Figure 8A, B shows 2D diagrams of color-coded frequency and amplitude of populational bursts in  $[G, W]$  plane. As seen in Fig. 8A, if  $W$  is fixed and  $G$  is increasing, for most values of  $W$ ,



frequency of populational bursting does not increase smoothly but there are distinct areas in which the frequency does not change much and transition points when frequency increases abruptly. For example, at lower values of  $W$  ( $W < 10$ ) there are one or two distinct transitions from the dark blue to light blue to cyan or the dark blue to cyan color in the diagram. This frequency transition is even more sharp at intermediate values of  $W$  (i.e.  $W \sim 20$ ): dark blue abruptly changes to yellow. Our simulations have shown that in the areas in which frequency does change much, the increasing  $G$  leads predominantly to synchronization of bursting neurons with  $I_{NaP}$  and involving in the populational bursting some neurons without  $I_{NaP}$ . However, at some higher values of  $G$ , the remaining tonically active neurons depolarize neurons with  $I_{NaP}$  that have not been initially involved in bursting, leading to abrupt transitions to a higher frequency. Then again increasing  $G$  results predominantly in synchronization of bursting neurons, this time at a higher frequency of populational bursting. Depending on particular connections and distribution of neuronal parameters these transitions might happen up to three times when  $W$  is fixed and  $G$  is increasing. After all neurons are involved in populational bursting and synchronized, further increase of  $G$  does not produce increase of frequency of populational bursting. On the contrary, at higher  $G$ , the length of the populational bursts starts increasing, leading to smooth transition to the slower populational bursting (shown by smooth transition from the cyan/yellow to blue in Fig. 8A) and eventually the population switches to sustained tonic activity (shown for higher  $W$  values by black in Fig. 8A,B).

With the increase of  $W$ , the unilateral excitatory chemical connections allow for a higher bursting frequency. If  $W$  is high enough, (if  $W > 20$  in our simulations) the model is capable of generating synchronous populational bursting at low values of  $G$  or even if electrical coupling in the population is absent. With a fixed  $G$ , the frequency of populational bursting is increasing with an increase of the total strength of the excitatory chemical connections ( $W$ ). However, the range of  $G$  in which the model generates populational bursting activity decreases with increasing  $W$  due to the earlier transition to sustained tonic activity of the majority neurons (black area in Fig. 8A, B). Figure 8B shows that the average changes in burst amplitude depending on the values  $G$  and  $W$  are quite smooth because the amplitude depends in a greater extent on how well neuron activity in the population is synchronized, and hence neuronal synchronization directly depends on increasing total strengths of the electrical and/or excitatory chemical connections (see also Figs 4 and 7).

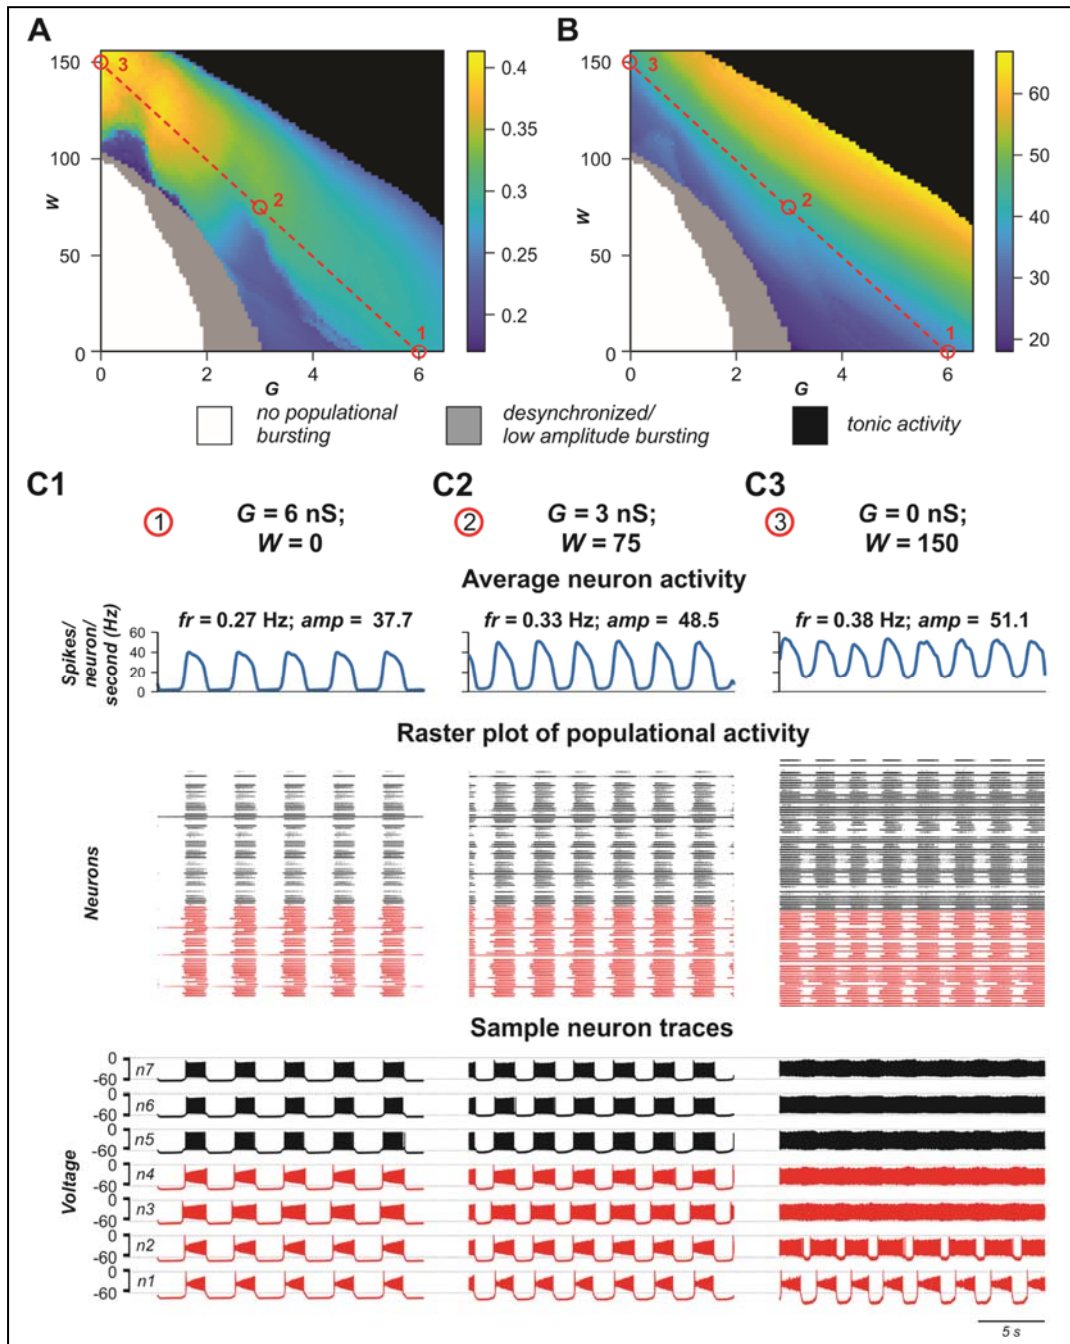

**Figure 8:** Role of electrical vs chemical coupling in generation of synchronized populational activity. **A**, **B**: 2D diagrams showing color-coded frequency (A) and amplitude (B) of populational bursting when the averaged total electrical ( $G$ ) or chemical ( $W$ ) synaptic input to each neuron in the population was varied. **C1-C3**: Examples of simulations for three pairs of  $G$  and  $W$  values indicated in A and B by small red circles. Arrangement and notation in C1-C3 are the same as in Fig. 4

Figure 8C1-C3 demonstrates the results of simulations for three pairs of  $G$  and  $W$  values shown by small red circles in Fig. 8A, B. In Fig. 8C1,  $W = 0$  and  $G = 6$  nS. In this case,  $G$  is high enough to generate synchronized populational bursting activity in the absence of excitatory chemical connections. In Fig. 8C2,  $G = 3$  nS and at that strength of electrical coupling the model cannot generate synchronized populational bursting in the absence of excitatory chemical connections. However, populational bursting can be re-established with increasing  $W$ , which is illustrated in Fig. 8C2 for  $W = 15$ . On the other hand, if  $W$  is high enough, populational bursting activity emerges even without electrical coupling of neurons in the population as can be seen in Fig. 8C3 at  $W = 30$  and  $G = 0$  nS. It should be noted that in the latter case, a higher level of background activity is present.

Altogether, our simulations indicate that both electrical and excitatory chemical connections between neurons in the heterogeneous population support synchronization of activities of individual neurons resulting in the rhythmic populational bursting activity.

## Discussion

This study extends the previous, experimental investigation by Ha and Dougherty (2018) published in the same journal that revealed the presence of electrical coupling between Shox2 nonV2a interneurons, which have been suggested to be critically involved in neuronal synchronization and generation of populational bursting in the neonatal rodent spinal cords. Here we used computational modeling to investigate the potential roles of different neural interactions (gap junction coupling and/or excitatory chemical synapses) and their interactions with the cellular  $I_{NaP}$ -dependent bursting properties in the neuronal synchronization and generation of locomotor-like oscillations. We simulated and analyzed the behavior of pair of neurons operating as well as heterogeneous population of 100 neurons in different states and connected by either gap junctions or excitatory chemical synapses and studied the possible role of electrical and chemical synaptic connection in populational bursting and control of frequency and amplitude of populational oscillations. The different aspects of our simulation results in connection with previous experimental findings as well as limitations of current studies are discussed below.

### **The role of electrical coupling between spinal interneurons in rhythmic activity in the isolated spinal cord of neonatal rodents**

Electrical coupling between neurons is known to be widely present in different regions of the central nervous system of mammals, including rodents, especially in the early stages of the development. Gap junctional coupling has been demonstrated to interconnect spinal Shox2 nonV2a neurons (Ha and Dougherty, 2018, the preceding paper) as well as Hb9 neurons (via other unidentified neurons, Wilson et al., 2007). It has been suggested that electrical coupling within each of these genetically identified populations significantly contributes to neuronal synchronization and populational bursting during spinal circuit development. Although the role of this coupling in the generation of locomotor-like oscillations in neonatal mouse cords has not been directly demonstrated for the specific spinal neuronal populations, pharmacological suppression of gap junctions in the cord in general resulted in a decrease of frequency and amplitude of locomotor-like oscillations recorded from ventral roots of the neonatal spinal cord during drug-evoked fictive locomotion (Ha and Dougherty 2018). Our simulations of a heterogeneous population of neurons connected with gap junctions have demonstrated the dependence of frequency and amplitude of populational bursting on the strength of electrical coupling and the

reduction of both characteristics with the reduction of this coupling, similar to the experimental results of pharmacology suppression of gap junction. This provides additional support for the role of electrical coupling in the locomotor activity in the spinal cords of neonatal rodents.

### **The potential role of persistent sodium current in locomotor-like oscillations in the cord and its interaction with gap junction neuronal coupling**

Despite many years of intensive investigations, the role of intrinsic biophysical neuronal properties in the generation of locomotor-like oscillations in the mammalian spinal cords remains largely unknown. Based on the previous data and computational models on the generation of respiratory oscillations in the mammalian brainstem (Butera et al., 1999a,b; Del Negro et al., 2001; Rybak et al., 2004), a series of computational models of spinal neurons has been developed by suggesting the critical role of  $I_{NaP}$  in the generation of locomotor rhythmic activity in the spinal cord (Rybak et al., 2006a,b; McCrea and Rybak, 2007). This suggestion has been partly supported by several independent studies confirming the presence of  $I_{NaP}$  in the neonatal rodent spinal cords (Zhong et al., 2007; Tazerart et al., 2007, 2008; Ziskind-Conhaim et al., 2008; Brocard et al., 2010, 2013; Tong et al. 2012). Consequently, most of the recent computational models of spinal circuits which incorporated  $I_{NaP}$  considered this current to be critically involved in the spinal cord rhythmogenesis (Sherwood et al., 2011; Zhong et al., 2012; Brocard et al., 2013; Rybak et al., 2013, 2015; Shevtsova et al. 2014, Danner et al. 2016, 2017; 2019; Shevtsova and Rybak, 2016; Ausborn et al. 2019). The persistent sodium channels, including their voltage-dependent activation, have been characterized in spinal Hb9 interneurons present in the spinal cord (Brocard et al., 2013) and presumably contribute to the generation and/or propagation of locomotor-like oscillations (Wilson et al., 2007; Ziskind-Conhaim et al., 2008; Brocard et al., 2013). Although  $I_{NaP}$  has not yet been characterized in *Shox2* neurons, there is evidence for the expression of persistent inward currents in these neurons which presumably include  $I_{NaP}$  (Ha et al., 2019). In this study, we followed the previous computational models of the spinal cord by suggesting that  $I_{NaP}$  plays critical role in the generation of locomotor-like oscillations. We, however, suggested that this current is present in, and randomly distributed over, only a subset of all neurons involved in generation of populational oscillations (with basic ratio of 40/60%). Our particular interest was in considering the behavior of neurons with and without  $I_{NaP}$  connected by gap junctions and the possible roles of this current and electrical coupling in initiation of synchronized bursting activity. We have shown that

electrical coupling leads to equilibration of membrane potentials between the coupled neurons. Depending on the membrane potentials of neurons, the electrical coupling can increase and decrease bursting frequency and bring neurons without  $I_{NaP}$  from silent or tonic to bursting mode hence amplifying neuronal synchronization. We have also shown that the presence of  $I_{NaP}$  in coupled neurons can amplify electrical coupling. This corresponds to conclusion made from other studies that  $I_{NaP}$  is a strong modulator of electrical synapses (Haas and Landisman, 2012). Finally, we have shown that the presence of  $I_{NaP}$  in some neurons in cooperation with electrical and/or chemical coupling between neurons promotes neuronal synchronization and that this current can be critical for initiation and support of populational bursting.

### **Gap junctions vs. chemical synaptic connections**

Electrical transmission has been shown to be prevalent during early postnatal period but decreases as the animal matures (Walton and Navarret 1991; Chang et al 1999). Although the decline is seen within the first postnatal week in motor neurons (Walton and Navarret 1991, Chang et al 1999), gap junctional coupling within both Shox2 non-V2a neuron and Hb9 neuron populations remains relatively high throughout the first two postnatal weeks (Ha and Dougherty 2018, Hinckley and Ziskind-Conhaim 2006). The probability of coupling among neighboring neurons was found to be ~0.33 (Ha and Dougherty 2018) and this is the value that was chosen for the modeling study. The probability value of 0.1 was set for chemical synapses and falls more in line with a prior Shox2 connectivity study (Dougherty et al 2013). There were a few key differences between the reports of Shox2 connectivity. First, the experiments showing connectivity by chemical synapses at a rate of ~10% (Dougherty et al 2013) was performed in mice where the Chx10 absence/presence was not distinguished so it included the entire Shox2 population as a single sampling group. Connections were tested in a dorsal horn removed preparation and were typically within the field of view of a 60x objective but not necessarily neighboring neurons and there were no instances of electrical connections reported. In the associated paper (Ha and Dougherty, 2018), pairs of neurons recorded were in close proximity (~50 $\mu$ m on average) and were selected based on the visualization of processes crossing and in close apposition. Further, these neurons were distinguished based on the presence/absence of Chx10 expression. Therefore, the 33% incidence of electrical synapses is only among very close neighboring neurons of the same group. In this study, chemical connections were only found at 2%, indicating that neighboring



neurons are less likely to be connected by chemical synapses. Both values of chemical connections are likely to be underestimated, particularly the one in which only near neighboring neurons were recorded. Interestingly, the discrepancies in the results of these studies reinforces the idea that electrical connectivity is mechanism for local synchronization.

Gap junctions behave as low pass filters efficiently convey membrane potential fluctuations. Additionally, action potentials in one Shox2 neuron reliably lead to spikelets in gap junctionally connected neurons. However, chemical synapses between neonatal Shox2 neurons had high failure rates (Ha and Dougherty 2018). Therefore, it is possible that there is a higher incidence of chemical synaptic connections in older ages, not due to new synapses but increased efficacy at synapses established early in development. The experimental study considered single pairs using dual recordings and responses to current injection in the presynaptic neuron. It is unlikely that the postsynaptic cell receives input from a single presynaptic Shox2 neuron. Gap junctional coupling between multiple presynaptic neurons will synchronize their firing, as demonstrated in the current study, likely leading to a more reliable excitation of the postsynaptic neuron, even if excitatory chemical synapses are both sparse and single synapses high synaptic failure rates. This could provide a mechanism for increased efficacy of excitatory transmission not only within the population but in transmission to downstream targets.

Using our model, we investigated how the activity of the population changes when changing electrical and chemical synaptic connections. Our simulations demonstrated that both electrical and excitatory chemical connections between neurons in the heterogeneous population support synchronization of activities of individual neurons resulting in the rhythmic population bursting activity. This implicitly confirms that the locomotor-like oscillations in spinal cord can be maintained over a continuum. Thus, the results suggest that gap junctional coupling strongly drives synchronization of the population. As bidirectional electrical coupling declines with age, other mechanisms can take over to maintain rhythmic bursting within the population. The change to a dominance of unidirectional chemical synaptic interactions, particularly with  $I_{NaP}$  present in a subset of these neurons, is sufficient to fulfill this role and to expand the range of attainable frequencies. Interestingly, our simulation results have demonstrated that a strong, synchronous population bursting can be produced in a population when as low as 10% of neurons are connected by excitatory chemical synapses.



## Limitations of the present studies and future directions

In this modeling study we limited single neuron models by incorporating only minimal number of ionic channels necessary for generation of neuronal spiking activity, such as fast sodium (Na) and potassium rectifier (K), and persistent sodium (NaP) involved in bursting rhythmic activity. Therefore, these models are largely generic. At the same time, we know that spinal neurons, and particularly Shox2 neuron types contain other ionic channels, including T-type calcium and h currents and different Ca and Ca-dependent potassium currents that can also support pacemaker properties and have been implicated in locomotor-like activity (Wilson et al., 2005; Anderson et al., 2012; Kiehn, 2016; Brocard, 2019). In addition, there is indirect evidence of an important role of Na<sup>+</sup>/K<sup>+</sup> pump in CPG operation (Kueh et al., 2016) and particularly in the neonatal spinal cords of mice (Picton et al., 2017). The of Na<sup>+</sup>/K<sup>+</sup> pump current has been previously included in the computational models of Hb9 neurons (Brocard et al., 2013) and can be included in Shox2 neuron models in the future. This current is known to interact with h-current (Kuen et al., 2016) and can specifically affect neuronal coupling via electrical and chemical synapses. This awaits additional experimental and computational investigations. A more realistic model of different types of spinal interneurons that includes different ionic channels with experimentally measured characteristics should be developed and investigated, which represents one of the directions of our future investigations.

The other limitation of the present study is the consideration of only excitatory interactions within the spinal network. The potential role of electrical coupling between inhibitory interneurons and the role of inhibitory network interactions in cooperation with gap junction (Bennett, 1997; Bennett and Zukin, 2004; Connors, 2017) will also be a focus of our future investigations.

The contribution of gap junctional coupling within specific populations to locomotor rhythmicity remains to be tested experimentally. The pharmacological studies are limiting in that the gap junction blockers are acting at all electrical synapses, which have been shown between several classes of interneurons (Wilson et al 2007, Hinckley and Ziskind-Conhaim 2006, Chopek et al , Zhong et al. 2010) and motor neurons (i.e. Walton and Navarret 1991, Tresch and Kiehn 2000, Rash et al 1996, Chang et al 1999). Additionally, carbenoxolone, the most common gap junction blocker, has been shown to have additional actions which may affect rhythmicity (Connors 2012, Tovar et al 2009, Elsen et al 2008). Therefore, conditional knockout studies are required to determine implications more precisely.

Finally, the mutual interactions between different classes of genetically identified excitatory and inhibitory interneurons present in the mammalian spinal cord also awaits further experimental and computational investigations.

## Materials and Methods

### Experimental methods

We performed further analysis of ventral root recordings during fictive locomotion (evoked with NMDA and 5-HT) prior to and after application of 100mM carbenoxolone, collected for Figure 6 the companion paper, with detailed methods contained therein (Ha and Dougherty, 2018). Here, twenty-five bursts immediately before carbenoxolone application and 30 min after the start of carbenoxolone application were subjected to analysis previously described (Dougherty et al 2013). Briefly, ventral root activity was rectified and smoothed (time constant 0.2s) in Spike2 (Cambridge Electronic Design). Recordings included either 2 ventral roots or 3 ventral roots. The cycle and amplitude values were taken from a rostral lumbar root (L1, L2, or L3) ipsilateral to a recorded caudal lumbar root (L4 or L5). The frequency was calculated from the mean cycle period, each measured from burst onset to onset. Amplitude was the measured peak amplitude of each burst. The mean values were normalized to the no drug condition to control for variations inter-experiment variation including root size, suction electrode size and seal.

### Computational methods

#### *Neuron model*

All neurons were simulated in the Hodgkin-Huxley style as single-compartment neuron models. The membrane potential,  $V$ , in neurons with  $I_{NaP}$  was described by the following differential equation:

$$C \times \frac{dV}{dt} = -I_{Na} - I_{NaP} - I_K - I_L - I_{Gap} - I_{Syn}, \quad (1)$$

where  $C$  is the membrane capacitance and  $t$  is time.

The membrane potential,  $V$ , in neurons without  $I_{NaP}$  current was described as follows:

$$C \times \frac{dV}{dt} = -I_{Na} - I_K - I_L - I_{Gap} - I_{Syn}, \quad (2)$$

The ionic currents in Eqs. (1) and (2) were described as follows:

$$\begin{aligned} I_{Na} &= \bar{g}_{Na} \times m_{Na}^3 \times h_{Na} \times (V - E_{Na}); \\ I_{NaP} &= \bar{g}_{NaP} \times m_{NaP} \times h_{NaP} \times (V - E_{Na}); \\ I_K &= \bar{g}_K \times m_K^4 \times (V - E_K); \\ I_L &= g_L \times (V - E_L); \end{aligned} \quad (3)$$

where  $I_{Na}$  is the fast sodium current with maximal conductance  $\bar{g}_{Na}$ ;  $I_{NaP}$  is the persistent (slowly inactivating) sodium current with maximal conductance  $\bar{g}_{NaP}$ ;  $I_K$  is the delayed-rectifier potassium current with maximal conductance  $\bar{g}_K$ ;  $I_L$  is the leakage current with constant conductance  $g_L$ .  $E_{Na}$ ,  $E_K$ , and  $E_L$  are the reversal potentials for sodium, potassium and leakage currents, respectively;  $m$  and  $h$  with indexes indicating corresponding currents are, respectively, the activation and inactivation variables of the corresponding ionic channels.

Dynamics of activation and inactivation variables of voltage-dependent ionic channels (e.g., Na, NaP, and K) in Eq. (3) was described by the following differential equations:

$$\begin{aligned}\tau_{mi}(V) \times \frac{d}{dt} m_i &= m_{\infty i}(V) - m_i; \\ \tau_{hi}(V) \times \frac{d}{dt} h_i &= h_{\infty i}(V) - h_i,\end{aligned}\tag{4}$$

where  $m_{\infty i}(V)$  and  $h_{\infty i}(V)$  define the voltage-dependent steady-state activation and inactivation of the channel  $i$ , respectively, and  $\tau_{mi}(V)$  and  $\tau_{hi}(V)$  define the corresponding time constants. Activation of the fast and persistent sodium channels is instantaneous. The expressions for channel kinetics in Eq. (4) are described as follows:

$$\begin{aligned}m_{\infty Na}(V) &= (1 + \exp(-(V + 42.5)/6.5))^{-1}; \tau_{mNa} = 0; \\ h_{\infty Na}(V) &= (1 + \exp((V + 65.5)/10.2))^{-1}; \\ \tau_{hNa}(V) &= 35.2/\cosh((V + 65.5)/12.8); \\ m_{\infty NaP}(V) &= (1 + \exp(-(V + 52)/3.2))^{-1}; \tau_{mNaP} = 0; \\ h_{\infty NaP}(V) &= (1 + \exp((V + 57)/5))^{-1}; \tau_{hNaP}(V) = T_{hmax}/\cosh((V + 57)/8); \\ m_{\infty K}(V) &= (1 + \exp(-(V + 34.5)/5))^{-1}; \tau_{mK}(V) = 10/\cosh((V + 34.5)/10).\end{aligned}\tag{5}$$

Parameters for channel kinetics were derived from Brocard et al. (2013). The maximal conductances for the fast sodium, delayed-rectifier potassium, leakage currents were, respectively:  $\bar{g}_{Na} = 80$  nS;  $\bar{g}_K = 100$  nS, and  $g_L = 1$  nS. The maximal conductance and inactivation time constant for  $I_{NaP}$ ,  $\bar{g}_{NaP}$  and  $T_{hmax}$ , and the leakage reversal potential,  $E_L$ , in different simulation were varied.

The synaptic current ( $I_{Syn}$  with conductance  $g_{Syn}$  and reversal potential  $E_{Syn}$ ) for the  $j$ -th neuron was described as follows:

$$I_{Syn,j} = g_{Syn} \cdot (\sum_{i=1}^N w_{Syn,ij} \cdot s_i) \cdot (V_j - E_{Syn}), \quad j = 1, \dots, N,\tag{6}$$

where for excitatory chemical synapses  $g_{Syn} = 1$  nS,  $E_{Syn} = 0$ , and  $w_{Syn,ij} = w_{Syn}$  is the  $i$ -th and  $j$ -neurons were synaptically coupled and equal to 0 otherwise. The values of  $w_{Syn}$  were varied.

The synaptic variable  $s$  was governed by first order activation scheme (Compte et al. 2005):

$$\frac{d}{dt}s = \alpha_s \cdot s_\infty \cdot (1 - s) - \frac{s}{\tau_s}, \text{ where } s_\infty = 1/(1 + \exp(-(V - V_{s12})/k_s)), \quad (7)$$

where  $\alpha_s = 1$ ;  $\tau_s = 15$  ms;  $V_{s12} = -20$ ; and  $k_s = 2$ .

The electrical coupling current  $I_{\text{Gap}}$  for the  $j$ -th neuron was described as follows:

$$I_{\text{Gap},j} = \sum_{i=1}^N \bar{g}_{\text{Gap},ij} \cdot (V_i - V_j), \quad j = 1, \dots, N, \quad (8)$$

where the coupling strength  $\bar{g}_{\text{Gap},ij} = g_{\text{Gap}}$  if the  $i$ -th and  $j$ -th neurons share a gap junction and is equal to 0 otherwise. The values of  $g_{\text{Gap}}$  were varied.

The following general neuronal parameters were assigned:  $C = 40$  pF;  $E_{\text{Na}} = 55$  mV;  $E_{\text{K}} = -80$  mV.

### ***Two-cell model***

Each neuron in the two-cell model represented either a bursting neuron incorporating the persistent sodium current,  $I_{\text{NaP}}$  or simple tonically spiking neuron non-incorporating  $I_{\text{NaP}}$ . Dynamics membrane potential of the bursting neuron was described by Eqs (1), (3-5) where  $\bar{g}_{\text{NaP}} = 4$  nS. These neurons were coupled either bidirectionally by electrical synapses as described by Eq. (8) ( $g_{\text{Gap}} = \{0.05, 0.1, 0.2\}$ ) or unidirectionally by AMPA synapse (see Eqs (6,7),  $w_{\text{Syn}} = \{0.5, 1, 2\}$ ). The initial operational regime of each neuron was defined by the value of its leakage reversal potential,  $E_L$  indicated in Tables 1 and 2.

### ***Neuron population***

The neuron population contained 100 neurons and included two subpopulations: neurons incorporating  $I_{\text{NaP}}$  (subpopulation 1) and neurons non-incorporating  $I_{\text{NaP}}$  (subpopulation 2). In our simulations,  $N_{\text{NaP}}$ , number of neurons incorporating  $I_{\text{NaP}}$ , varied from 20 to 40 and the observed results were qualitatively similar.

Heterogeneity of neurons within the population was provided by random distributions of the baseline values of the mean conductance,  $g_L$ , of the leakage channel and the leakage reversal potentials,  $E_{L0i}$  ( $i = 1, 2$ ) for two subpopulations, and mean maximal conductance of the persistent sodium channel  $\bar{g}_{\text{NaP}}$  in the subpopulation of neurons incorporating  $I_{\text{NaP}}$ , and initial conditions for the values of membrane potential and channel kinetics variables. The baseline values of distributed parameters and initial conditions were assigned prior to simulations from their defined average

values and variances using a random number generator (normal distribution), and a settling period of 10-40 s was allowed in each simulation. In our simulations we varied  $E_{L01} = \{-73, -74, -75\}$  for subpopulation of neurons with  $I_{NaP}$ ;  $E_{L02} = \{-68, -70, -72\}$  for subpopulation of neurons without  $I_{NaP}$ ; parameter  $\bar{g}_{NaP}$  was varied in the range of [2, 5]. We also run simulation with different values of the maximal time constant of the persistent  $NaP^+$  current inactivation,  $T_{hmax} = \{7, 9, 10\}$  seconds. In simulations for the populational model shown in this paper:  $N_{NaP} = 40$ ;  $E_{L01} = -74 \pm 14.8$  mV;  $E_{L02} = -70 \pm 14$  mV;  $g_L = 1 \pm 0.2$ ;  $\bar{g}_{NaP} = 4 \pm 0.8$ ;  $T_{hmax} = 9$  s, if not stated otherwise.

Random connections between neurons in the population were assigned prior to each simulation based on probability of connections. A random number generator was used to define the existence of each synaptic connection. Typically, we used  $p_{Gap} = 0.3$  for gap junctional connections and  $p_{Syn} = 0.1$  for excitatory chemical connections in our simulations. After the distribution of connections was set, the connection strengths of electrical and/or excitatory chemical synapses ( $g_{Gap}$  and  $w_{Syn}$ ) were altered. To estimate dependence of the model behavior on coupling strength and type when both types of connections were present on the model, we introduced two variables  $G$  and  $W$ , ( $G = N \times p_{Gap} \times g_{Gap}$  and  $W = N \times p_{Syn} \times w_{Syn}$ ), characterizing the average total network electrical or chemical synaptic input to each neuron in the population. To define electrical and chemical synapses in the populational model we used standard definition of these synapses by Brain2 (Stimberg et al. 2014; 2019). The coupling strengths for electrical and chemical connection ( $g_{Gap}$  and  $w_{Syn}$  or  $G$  and  $W$ ) are specified for each simulation.

### ***Computer simulations***

The simulations for the two-cell model were run by using a custom Matlab script (The Mathworks, Inc., Matlab 2020a). The simulations for the populational model were performed using the custom script written in Python and implemented in Brian2 environment (Stimberg et al. 2014; 2019). Differential equations were solved using the second order Runge-Kutta integration method. Simulation results were saved as the ASCII file containing the values of  $g_{Gap}$  and  $w_{Syn}$  and calculated mean values and standard deviation over simulation time for the period and amplitude of populational bursting. We also saved the figures showing populational activity, raster plot of neuron spiking, and voltage traces of sample neurons over simulation time to visually estimate the results of simulations. Model configuration files to create the simulations presented in the paper

are available in ModelDB (McDougal et al., 2017) at <http://modeldb.yale.edu/> (will be uploaded after revision).

### ***Data analysis in computer simulations***

The results of simulations were processed by custom Matlab scripts (The Mathworks, Inc., Matlab 2020a). For each neuron period of bursting was estimated as the difference between two consecutive burst onsets and averaged for the time course of simulation. Frequency was calculated as reciprocal to the period. To assess the populational model behavior, the averaged integrated activity of the population (average number of spikes per neuron per second) was used to calculate the oscillation period. The timing of burst onsets was determined at a threshold level equal to 50% of the average difference between maximal and minimal populational burst amplitude in the current simulation. For some simulation with less stable populational activity we determined the threshold level manually by considering the visualized results of simulation. The bursting period was defined as the duration between two consecutive burst onsets. Duration of individual simulations depended on the values of parameters  $g_{Gap}$  and  $w_{Syn}$ , and to robustly estimate average value of the oscillation period, the first 10–20 transitional cycles were omitted to allow stabilization of model variables, and the values of the bursting period and maximal amplitude were averaged for the next 10–20 consecutive cycles. To build 2D diagrams we estimated stability of the populational bursting activity by the calculated values of the period and amplitude of populational bursting and their standard deviation. All simulations were divided in four groups: no populational activity, low amplitude (less than 10 spikes per neuron per second) or highly unstable populational activity (s.t.d. of calculated period  $\geq 50\%$ ), stable populational bursting, and tonic populational activity. For the stable populational bursting, frequency of populational oscillations was determined as reciprocal to the mean period. The calculated frequency and amplitude were color-coded to build 2D diagrams in  $G \times W$  parameter space ( $G = N \times p_{Gap} \times g_{Gap}$  and  $W = N \times p_{Syn} \times w_{Syn}$ ). Re-initialization of the randomized parameters within the same ranges resulted in qualitatively similar simulation results.



## **Acknowledgements**

This study was supported by grants from the National Institutes of Health (R01 NS090919; R01 NS095366; R01 NS100928; R01 NS110550). We are grateful to Simon Danner and Lihua Yao for technical assistance

## **Author contributions**

Natalia A. Shevtsova, Conceptualization, Software, Formal analysis, Investigation, Visualization, Writing—original draft, Writing—review and editing; Ngoc T Ha, Conceptualization, Investigation, Writing—review and editing; Ilya A. Rybak, Conceptualization, Formal analysis, Supervision, Funding acquisition, Investigation, Validation, Writing—original draft, Writing—review and editing; Kimberly J Dougherty, Conceptualization, Formal analysis, Supervision, Funding acquisition, Investigation, Validation, Writing—original draft, Writing—review and editing.

## **Author ORCIDs**

Natalia A Shevtsova <http://orcid.org/0000-0002-1971-9707>

Ilya A Rybak <https://orcid.org/0000-0003-3461-349X>

Kimberly J Dougherty <http://orcid.org/0000-0002-0807-574X>

## **Ethics**

Animal experimentation: All experimental procedures followed NIH guidelines and were approved by the Institutional Animal Care and Use Committee at Drexel University (protocols 20317 and 20657).

## References

- Anderson TM, Abbinanti MD, Peck JH, Gilmour M, Brownstone RM, Masino MA. 2012. Low-threshold calcium currents contribute to locomotor-like activity in neonatal mice. *Journal of Neurophysiology* **107**:103–113. DOI: 10.1152/jn.00583.2011, PMID: 21994264
- Ausborn J, Shevtsova NA, Vittorio Caggiano V, Danner SM, Rybak IA. 2019. Computational modeling of brainstem circuits controlling locomotor frequency and gait. *eLife* **8**:e43587. DOI: <https://doi.org/10.7554/eLife.43587>, PMID: 30663578
- Bennett MV. 1997. Gap junctions as electrical synapses. *Journal of Neurocytology* **26(6)**:349-66. doi: 10.1023/a:1018560803261. PMID: 9278865
- Bennett MV, Zukin RS. 2004. Electrical coupling and neuronal synchronization in the Mammalian brain. *Neuron* **41(4)**:495-511. DOI: 10.1016/s0896-6273(04)00043-1. PMID: 14980200
- Brocard F, Shevtsova NA, Bouhadfane M, Tazerart S, Heinemann U, Rybak IA, Vinay L. 2013. Activity-dependent changes in extracellular Ca<sup>2+</sup> and K<sup>+</sup> reveal pacemakers in the spinal locomotor-related network. *Neuron* **77**:1047-1054. DOI: 10.1016/j.neuron.2013.01.026, PMID: 23522041
- Brocard F, Tazerart S, Vinay L. 2010. Do pacemakers drive the central pattern generator for locomotion in mammals? *Neuroscientist* **16**:139 –155. DOI: 10.1177/1073858409346339, PMID: 20400712
- Brocard F. 2019. New channel lineup in spinal circuits governing locomotion. *Current Opinion in Physiology* **8**:14-22.
- Brownstone RM, Wilson JM. 2008. Strategies for delineating spinal locomotor rhythm-generating networks and the possible role of Hb9 interneurons in rhythmogenesis. *Brain Research Reviews* **57**:64–76. DOI: <https://doi.org/10.1016/j.brainresrev.2007.06.025>, PMID: 17905441
- Butera RJ, Rinzel JR, Smith JC. 1999a Models of respiratory rhythm generation in the pre-Bötzinger complex. I. Bursting pacemaker neurons. *Journal of Neurophysiology* **82(1)**:382-97. DOI: 10.1152/jn.1999.82.1.382. PMID: 10400966
- Butera RJ, Rinzel JR, Smith JC. 1999b. Models of respiratory rhythm generation in the pre-Bötzinger complex: II. Populations of coupled pacemaker neurons. *Journal of Neurophysiology* **82**:398-415. DOI: 10.1152/jn.1999.82.1.398. PMID: 10400967
- Chang Q1, Gonzalez M, Pinter MJ, Balice-Gordon RJ. 1999. Gap junctional coupling and patterns of connexin expression among neonatal rat lumbar spinal motor neurons. *The Journal of Neuroscience* **19(24)**:10813-10828. DOI: <https://doi.org/10.1523/JNEUROSCI.19-24-10813.1999>, PMID: 10594064
- Chopek JW, Nascimento F, Beato M, Brownstone RM, Zhang Y. 2018. Sub-populations of spinal V3 Interneurons form focal modules of layered pre-motor microcircuits. *Cell Reports* **25**:146–156. DOI: <https://doi.org/10.1016/j.celrep.2018.08.095>, PMID: 30282024
- Compte A, Sanchez-Vives MV, McCormick DA, Wang XJ. 2003. Cellular and network mechanisms of slow oscillatory activity (<1 Hz) and wave propagations in a cortical network model. *Journal of Neurophysiology* **89**:2707–2725. DOI: 10.1152/jn.00845.2002, PMID: 12612051

- Connors BW, 2017. Synchrony and so much more: Diverse roles for electrical synapses in neural circuits. *Developmental Neurobiology* **77(5)**:610-624. DOI: 10.1002/dneu.22493. PMID: 28245529
- Connors BW. 2012. Tales of a dirty drug: Carbenoxolone, gap junctions, and seizures *Epilepsy Currents* **12(2)**:66–68. DOI: <https://doi.org/10.5698/1535-7511-12.2.66>, PMID: 22473546
- Danner SM, Shevtsova NA, Frigon A, Rybak IA. 2017. Computational modeling of spinal circuits controlling limb coordination and gaits in quadrupeds. *eLife* **6**:e31050. DOI: <https://doi.org/10.7554/eLife.31050>, PMID: 29165245
- Danner SM, Wilshin SD, Shevtsova NA, Rybak IA. 2016. Central control of interlimb coordination and speed- dependent gait expression in quadrupeds. *The Journal of Physiology* **594**:6947–6967. DOI: <https://doi.org/10.1113/JP272787>, PMID: 27633893
- Del Negro CA, Johnson SM, Butera RJ, Smith JC. 2001. Models of respiratory rhythm generation in the pre-Bötzinger complex. III. Experimental tests of model predictions. *Journal of Neurophysiology* **86(1)**:59-74. DOI: 10.1152/jn.2001.86.1.59, PMID: 11431488
- Del Negro CA, Koshiya N, Butera RJ, Smith JC. 2002. Persistent sodium current, membrane properties and bursting behavior of pre-botzinger complex inspiratory neurons in vitro. *Journal of Neurophysiology* **88**:2242–2250. DOI: 10.1152/jn.00081.2002, PMID: 12424266
- Dougherty KJ, Zagoraoui L, Satoh D, Rozani I, Doobar S, Arber S, Jessell TM, Kiehn O. 2013. Locomotor rhythm generation linked to the output of spinal shox2 excitatory interneurons. *Neuron* **80**:920–933. DOI: <https://doi.org/10.1016/j.neuron.2013.08.015>, PMID: 24267650
- Elsen FP, Shields EJ, Roe MT, VanDam RJ, Jonathan D Kely JD. 2008. Carbenoxolone induced depression of rhythmogenesis in the pre-Bötzinger Complex. *BMC Neuroscience* **9**:46. DOI: 10.1186/1471-2202-9-46 , PMID: 18500991
- Ha NT, Dougherty KJ. 2018. Spinal Shox2 interneuron interconnectivity related to function and development. *eLife* **7**:e42519. DOI: <https://doi.org/10.7554/eLife.42519>, PMID: 30596374
- Ha NT, Shevtsova NA, Rybak IA, Dougherty KJ. 2019. Data driven modeling of the rhythmogenic potential of spinal Shox2 neurons. *Society for Neuroscience Annual Meeting Abstract* No 12112.
- Haas JS, Landisman CE. 2012 Bursts modify electrical synaptic strength. *Brain Research* **1487**:140-149. DOI: 10.1016/j.brainres.2012.05.061, PMID: 22771703
- Hägglund M, Borgius L, Dougherty KJ, Kiehn O. 2010. Activation of groups of excitatory neurons in the mammalian spinal cord or hindbrain evokes locomotion. *Nature Neuroscience* **13**:246–252. DOI: <https://doi.org/10.1038/nn.2482>, PMID: 20081850
- Hinckley CA, Ziskind-Conhaim L. 2006. Electrical coupling between locomotor-related excitatory interneurons in the mammalian spinal cord. *The Journal of Neuroscience* **26**:8477–8483. DOI: <https://doi.org/10.1523/JNEUROSCI.0395-06.2006>, PMID: 16914672
- Kiehn O. 2016. Decoding the organization of spinal circuits that control locomotion. *Nature Reviews Neuroscience* **17**:224–238. DOI: <https://doi.org/10.1038/nrn.2016.9>, PMID: 26935168
- Kjaerulff O, Kiehn O. 1996. Distribution of networks generating and coordinating locomotor activity in the neonatal rat spinal cord in vitro: a lesion study. *The Journal of Neuroscience* **16**:5777–5794. DOI: <https://doi.org/10.1523/JNEUROSCI.16-18-05777.1996>, PMID: 8795632

- Koizumi H, Smith JC. 2008. Persistent Na<sup>+</sup> and K<sup>+</sup>-dominated leak currents contribute to respiratory rhythm generation in the pre-Bötzinger complex in vitro. *The Journal of Neuroscience* **28**(7):1773-1785. DOI: 10.1523/JNEUROSCI.3916-07.2008, PMID: 18272697
- Kueh D, Barnett WH, Cymbalyuk GS, Calabrese RL. 2016. Na<sup>+</sup>/K<sup>+</sup> pump interacts with the h-current to control bursting activity in central pattern generator neurons of leeches. *eLife* **5**:e19322. DOI: 10.7554/eLife.19322, PMID: 27588351
- McCrea DA, Rybak IA. 2007. Modeling the mammalian locomotor CPG: insights from mistakes and perturbations. *Progress in Brain Research* **165**:235–253. DOI:10.1016/S0079-6123(06)65015-2, PMID: 17925250
- McDougal RA, Morse TM, Carnevale T, Marenco L, Wang R, Migliore M, Miller PL, Gordon Shepherd M, Hines ML. 2017. Twenty years of ModelDB and beyond: building essential modeling tools for the future of neuroscience. *Journal of Computational Neuroscience* **42**:1–10. DOI:10.1007/s10827-016-0623-7, PMID: 27629590
- Picton LD, Zhang HY, Sillar KT. 2017. Sodium pump regulation of locomotor control circuits *Journal of Neurophysiology* **118**:1070–1081. DOI: 10.1152/jn.00066.2017, PMID: 28539392
- Rash JE1, Dillman RK, Bilhartz BL, Duffy HS, Whalen LR, Yasumura T 1996. Mixed synapses discovered and mapped throughout mammalian spinal cord. *Proceedings of the National Academy of Sciences of the USA* **93**:4235–4239. DOI: <https://doi.org/10.1073/pnas.93.9.4235>, PMID: 8633047
- Rybak IA, Dougherty KJ, Shevtsova NA. 2015. Organization of the mammalian locomotor CPG: Review of computational model and circuit architectures based on genetically identified spinal interneurons. *eNeuro* **2**(5):ENEURO.0069-15.2015. DOI:10.1523/ENEURO.0069-15.2015, PMID: 26478909
- Rybak IA, Shevtsova NA, Kiehn O. 2013. Modelling genetic reorganization in the mouse spinal cord affecting left-right coordination during locomotion. *The Journal of Physiology* **591**:5491–5508. DOI:10.1113/jphysiol.2013.261115, PMID: 24081162
- Rybak IA, Shevtsova NA, Lafreniere-Roula M, McCrea DA. 2006a. Modelling spinal circuitry involved in locomotor pattern generation: insights from deletions during fictive locomotion. *The Journal of Physiology* **577**:617–39. DOI:10.1113/jphysiol.2006.118703, PMID: 17008376
- Rybak IA, Shevtsova NA, Ptak K, McCrimmon DR. 2004. Intrinsic bursting activity in the pre-Bötzinger complex: role of persistent sodium and potassium currents. *Biological Cybernetics* doi: 10.1007/s00422-003-0447-1, PMID: 14762725
- Rybak IA, Stecina K, Shevtsova NA, McCrea DA. 2006b. Modelling spinal circuitry involved in locomotor pattern generation: insights from the effects of afferent stimulation. *The Journal of Physiology* **577**:641–658. dDOI:10.1113/jphysiol.2006.118711, PMID: 17008375
- Sherwood WE, Harris-Warrick R, Guckenheimer J. 2011. Synaptic patterning of left-right alternation in a computational model of the rodent hindlimb central pattern generator. *Journal of Computational Neuroscience* **30**(2):323-60. doi: 10.1007/s10827-010-0259-y, PMID: 20644988

- Shevtsova NA, Rybak IA. 2016. Organization of flexor-extensor interactions in the mammalian spinal cord: nsights from computational modelling. *The Journal of Physiology* **594**:6117–6131. DOI: <https://doi.org/10.1113/JP272437>, PMID: 27292055
- Shevtsova NA, Talpalar AE, Markin SN, Harris-Warrick RM, Kiehn O, Rybak IA. 2015. Organization of left-right coordination of neuronal activity in the mammalian spinal cord: insights from computational modelling. *The Journal of Physiology* **593**:2403–2426. DOI: <https://doi.org/10.1113/JP270121>, PMID: 25820677
- Stimberg M, Brette R, Goodman DFM. 2019. Brian 2, an intuitive and efficient neural simulator. *eLife* **8**:e47314. DOI: 10.7554/eLife.47314
- Stimberg M, Goodman DFM, Benichoux V, Brette R. 2014. Equation-oriented specification of neural models for simulations. *Frontiers in Neuroinformatics* **8**:6. DOI: 10.3389/fninf.2014.00006, PMID: 24550820
- Tazerart S, Viemari J-C, Darbon P, Vinay L, Brocard F. 2007. Contribution of persistent sodium current to locomotor pattern generation in neonatal rats. *Journal of Neurophysiology* **98**:613–628. DOI: 10.1152/jn.00316.2007, PMID: 17567773
- Tazerart S, Vinay L, Brocard F. 2008 The persistent sodium current generates pacemaker activities in the central pattern generator for locomotion and regulates the locomotor rhythm. *The Journal of Neuroscience* **28**:8577–8589. DOI: 10.1523/JNEUROSCI.1437-08.2008 , PMID: 18716217
- Tong H, McDearmid JR. 2012. Pacemaker and plateau potentials shape output of a developing locomotor network. *Current Biology* **22(24)**:2285-2293. DOI: 10.1016/j.cub.2012.10.025, PMID: 23142042
- Tovar KR, Maher BJ, Westbrook GL. 2009. Direct actions of carbenoxolone on synaptic transmission and neuronal membrane properties. *Journal of Neurophysiology* **102**:974–978. DOI: <https://doi.org/10.1152/jn.00060.2009>, PMID: 19535488
- Walton KD, Navarrete R. 1991. Postnatal changes in motoneurone electrotonic coupling studied in the in vitro rat lumbar spinal cord. *The Journal of Physiology* **433**:283–305. DOI: <https://doi.org/10.1113/jphysiol.1991.sp018426>, PMID: 1668753
- Wilson JM, Cowan AI, Brownstone RM. 2007. Heterogeneous electrotonic coupling and synchronization of rhythmic bursting activity in mouse Hb9 interneurons. *Journal of Neurophysiology* **98**:2370–2381. DOI: <https://doi.org/10.1152/jn.00338.2007>, PMID: 17715199
- Wilson JM, Hartley R, Maxwell DJ, Todd AJ, Lieberam I, Kaltschmidt JA, Yoshida Y, Jessell TM, Brownstone RM. 2005. Conditional rhythmicity of ventral spinal interneurons defined by expression of the Hb9 homeodomain protein. *The Journal of Neuroscience* **25**:5710–5719. DOI: <https://doi.org/10.1523/JNEUROSCI.0274-05.2005>, PMID: 15958737
- Zhong G, Droho S, Crone SA, Dietz S, Kwan AC, Webb WW, Sharma K, Harris-Warrick RM. 2010. Electrophysiological characterization of V2a interneurons and their locomotor-related activity in the neonatal mouse spinal cord. *The Journal of Neuroscience* **30**:170–182. DOI: <https://doi.org/10.1523/JNEUROSCI.4849-09.2010>, PMID: 20053899
- Zhong G, Droho S, Crone SA, Dietz S, Kwan AC, Webb WW, Sharma K, Harris-Warrick RM. 2010. Electrophysiological characterization of V2a interneurons and their locomotor-related

activity in the neonatal mouse spinal cord. *The Journal of Neuroscience* **30**:170–182. DOI: <https://doi.org/10.1523/JNEUROSCI.4849-09.2010>, PMID: 20053899

Zhong G, Masino MA, Harris-Warrick RM. 2007. Persistent sodium currents participate in fictive locomotion generation in neonatal mouse spinal cord. *The Journal of Neuroscience* **26(24)**:6509-6517. DOI: 10.1523/JNEUROSCI.1410-06.2006, PMID: 16775138

Zhong G, Shevtsova NA, Rybak IA, Harris-Warrick RM. 2012. Neuronal activity in the isolated mouse spinal cord during spontaneous deletions in fictive locomotion: insights into locomotor central pattern generator organization. *The Journal of Physiology* **590**:4735–4759. DOI: <https://doi.org/10.1113/jphysiol.2012.240895>, PMID: 22869012

Ziskind-Conhaim L, Wu L, Wiesner EP. 2008. Persistent sodium current contributes to induced voltage oscillations in locomotor-related Hb9 interneurons in the mouse spinal cord. *Journal of Neurophysiology* **100**:2254–2264. DOI: 10.1152/jn.90437.2008, PMID: 18667543
